# Supplementary material for: A cellular screen identifies ponatinib and pazopanib as inhibitors of necroptosis
Source: PubMed Central journal article supplement (PMC4669708; doi:10.1038/cddis.2015.130), 2015-05-21

Supplementary Figure 1

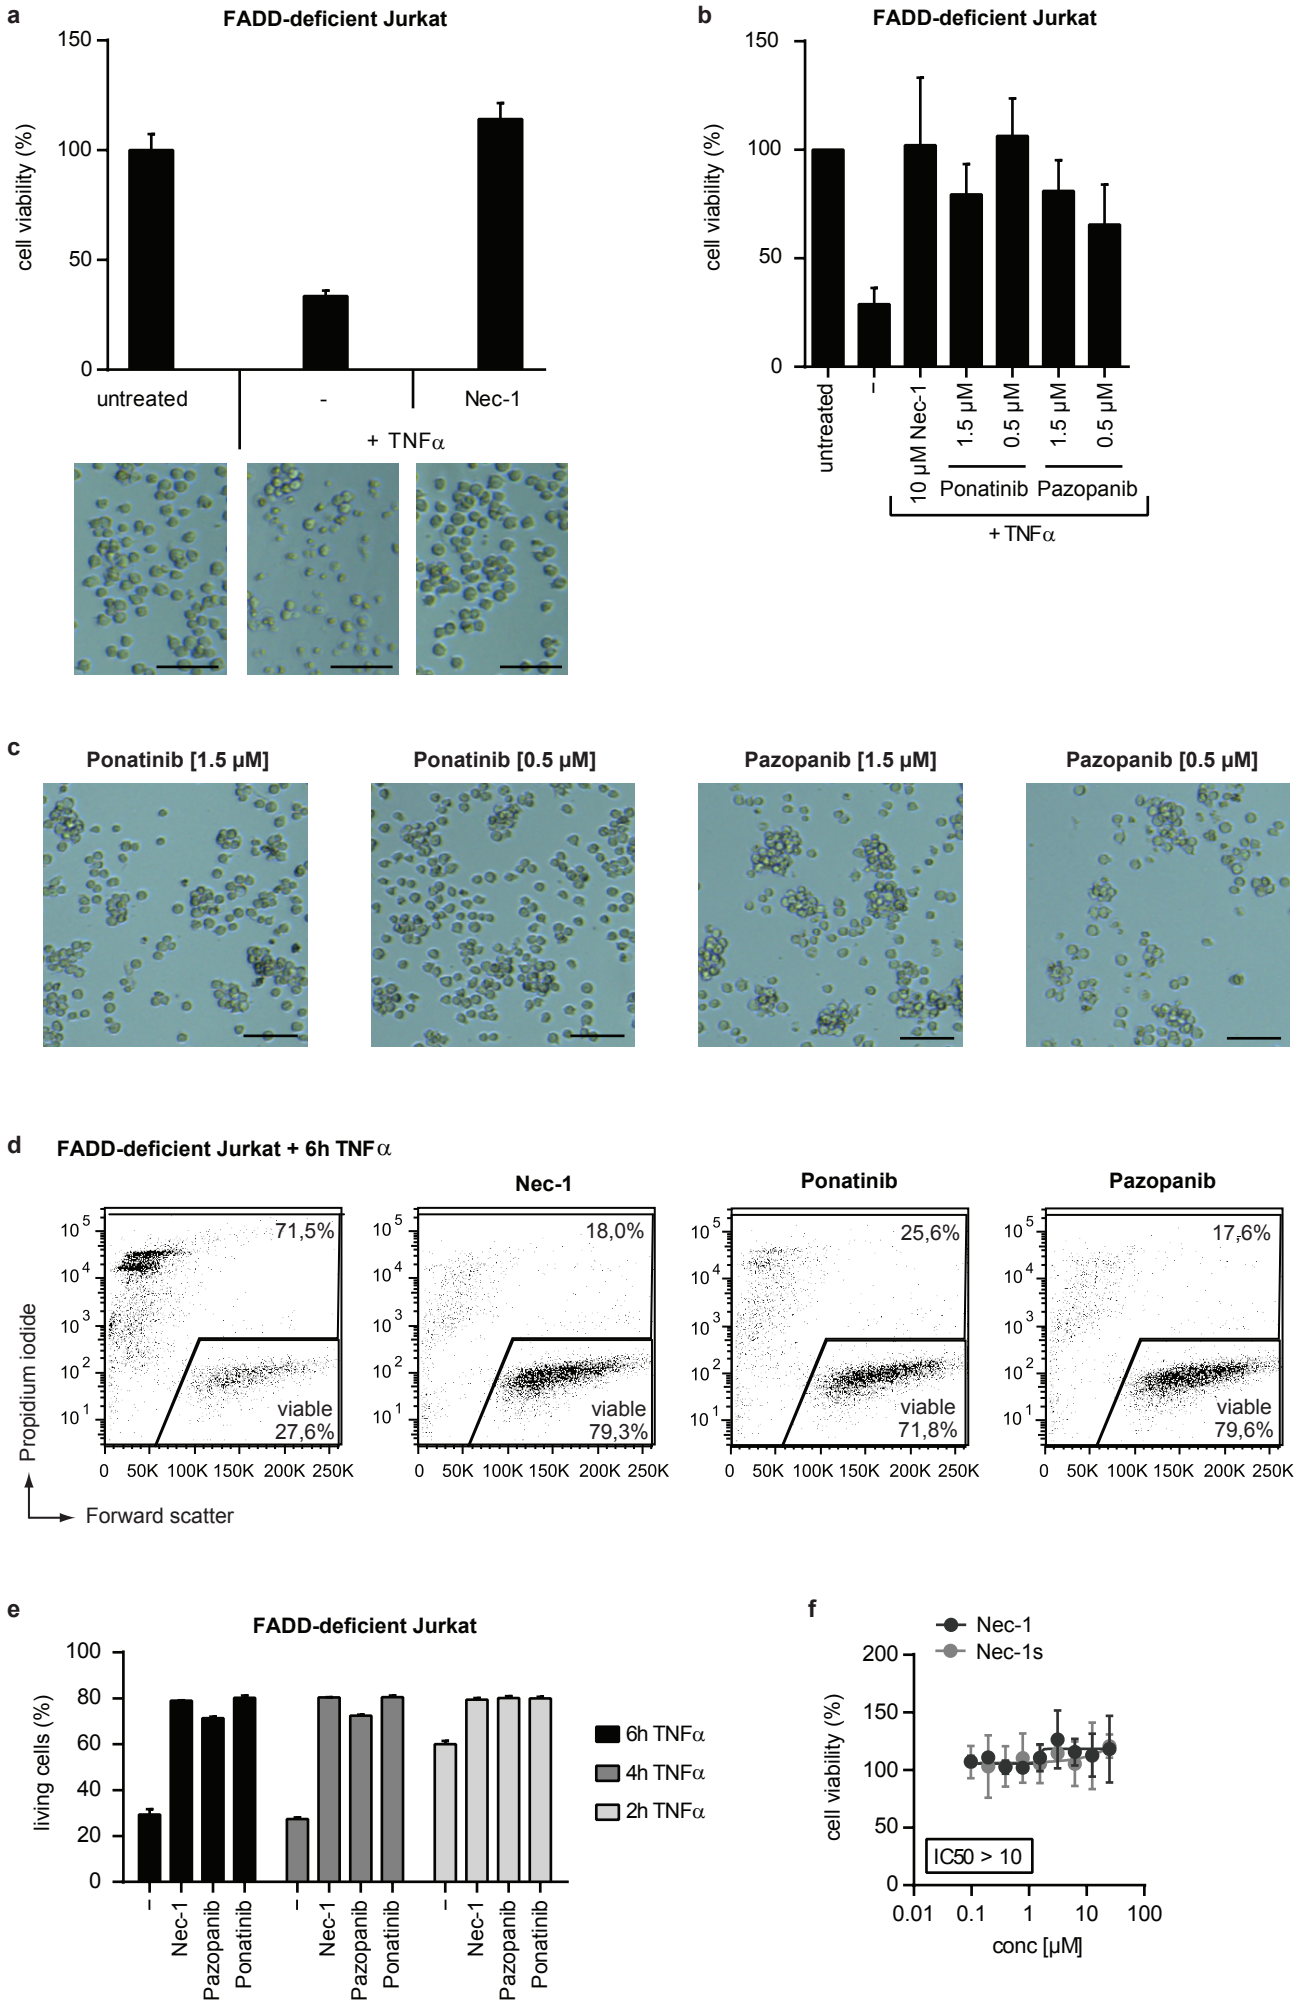

Supplement: cddis2015130x1.pdf [file cddis2015130x1.pdf]
