# Supplementary material for: A cellular screen identifies ponatinib and pazopanib as inhibitors of necroptosis
Source: PubMed Central journal article supplement (PMC4669708; doi:10.1038/cddis.2015.130), 2015-05-21

**Supplementary Figure 4**

**a HT-29 MLKL S358D**

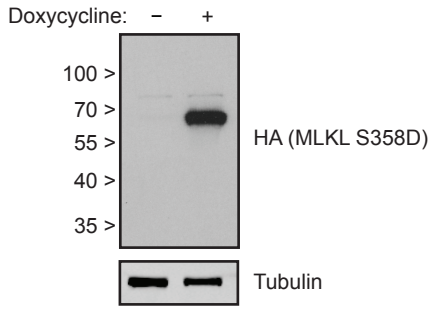

**b RIPK1**

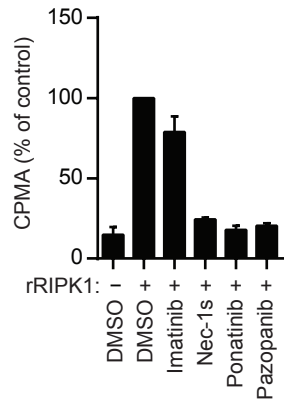

**c RIPK3**

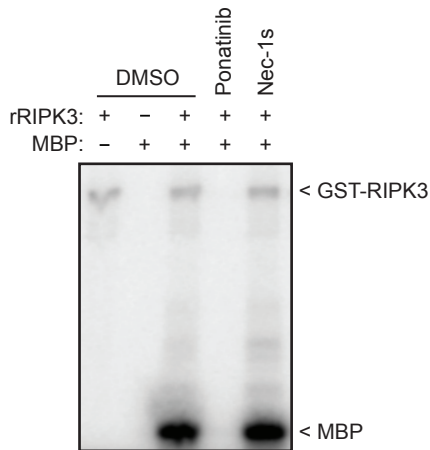

**d HT-29 MLKL**

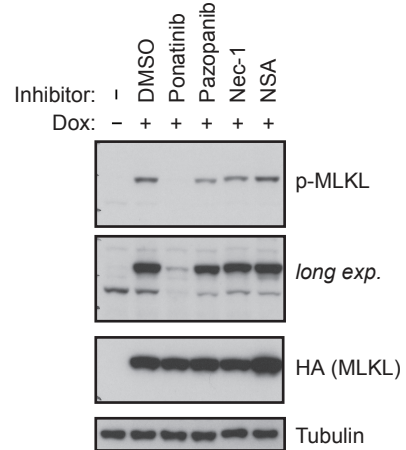

Supplement: cddis2015130x4.pdf [file cddis2015130x4.pdf]
