# Supplementary material for: A cellular screen identifies ponatinib and pazopanib as inhibitors of necroptosis
Source: PubMed Central journal article supplement (PMC4669708; doi:10.1038/cddis.2015.130), 2015-05-21

Supplementary Figure 5

**a** HT-29 MLKL S358D

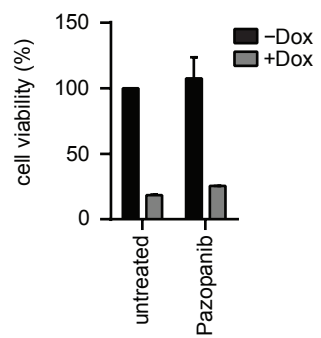

**b** RIPK3

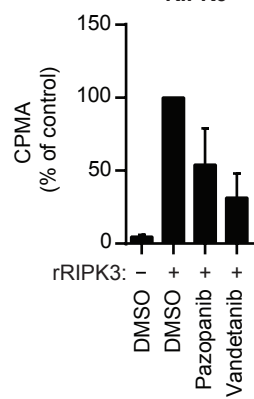

Supplement: cddis2015130x5.pdf [file cddis2015130x5.pdf]
