# Supplementary material for: A cellular screen identifies ponatinib and pazopanib as inhibitors of necroptosis
Source: PubMed Central journal article supplement (PMC4669708; doi:10.1038/cddis.2015.130), 2015-05-21
Supplement: cddis2015130x7.pdf [file cddis2015130x7.pdf]

Supplementary Table 1: Average (Av.) and total spectral counts (SC) for proteins identified by LC-MS/MS analysis in c-ponatinib pulldowns performed without or with competing (comp.) free ponatinib. Kinases are highlighted in **bold** and kinase targets shared by other BCR-ABL inhibitors (45, 46) are marked with \*. Proteins involved in necroptosis signaling are highlighted in **red**.

| Protein label   | Full protein name                                                        | Av. SC | Total SC | Av. SC comp. | Total SC comp. | p-value  |   |
|-----------------|--------------------------------------------------------------------------|--------|----------|--------------|----------------|----------|---|
| <b>MAP4K1</b>   | Mitogen-activated protein kinase kinase kinase kinase 1                  | 46.75  | 187      | 2.5          | 10             | 6.34E-10 | * |
| <b>ZAK</b>      | Mitogen-activated protein kinase kinase kinase MLT                       | 65.25  | 261      | 0            | 0              | 2.12E-09 | * |
| <b>LCK</b>      | Tyrosine-protein kinase Lck                                              | 98.5   | 394      | 0.75         | 3              | 2.91E-09 | * |
| <b>CSK</b>      | Tyrosine-protein kinase CSK                                              | 52.25  | 209      | 4.5          | 18             | 1.28E-08 | * |
| <b>PTK2B</b>    | Protein-tyrosine kinase 2-beta                                           | 32.5   | 130      | 0            | 0              | 1.37E-08 | * |
| <b>MAP3K7</b>   | Mitogen-activated protein kinase kinase kinase 7                         | 19.5   | 78       | 2.25         | 9              | 4.72E-08 |   |
| YWHAB           | 14-3-3 protein beta/alpha                                                | 7      | 28       | 1            | 4              | 5.18E-08 |   |
| <b>TNIK</b>     | TRAF2 and NCK-interacting protein kinase                                 | 26.75  | 107      | 0            | 0              | 5.6E-08  | * |
| <b>JAK1</b>     | Tyrosine-protein kinase JAK1                                             | 21.5   | 86       | 0            | 0              | 5.81E-08 |   |
| <b>MAPKAPK2</b> | MAP kinase-activated protein kinase 2                                    | 23.5   | 94       | 0            | 0              | 6.16E-08 |   |
| YWHAE           | 14-3-3 protein epsilon                                                   | 13     | 52       | 1            | 4              | 8.52E-08 |   |
| <b>CDK16</b>    | Cyclin-dependent kinase 16                                               | 10.75  | 43       | 1.25         | 5              | 1.28E-07 |   |
| <b>ABL2</b>     | Abelson tyrosine-protein kinase 2                                        | 17.25  | 69       | 0            | 0              | 1.37E-07 | * |
| <b>RIPK3</b>    | Receptor-interacting serine/threonine-protein kinase 3                   | 17     | 68       | 0            | 0              | 1.56E-07 |   |
| UNC119          | Protein unc-119 homolog A                                                | 20.5   | 82       | 0            | 0              | 2.01E-07 |   |
| <b>ABL1</b>     | Abl1 human spliceform 1a (myristoylated)                                 | 13.75  | 55       | 0            | 0              | 2.23E-07 | * |
| <b>TAOK3</b>    | Serine/threonine-protein kinase TAO3                                     | 13     | 52       | 2            | 8              | 2.52E-07 | * |
| <b>MAPK14</b>   | Mitogen-activated protein kinase 14                                      | 79.25  | 317      | 7.25         | 29             | 2.7E-07  | * |
| <b>IRAK1</b>    | Interleukin-1 receptor-associated kinase 1                               | 24.25  | 97       | 4            | 16             | 3.54E-07 |   |
| <b>TYK2</b>     | Non-receptor tyrosine-protein kinase TYK2                                | 14     | 56       | 0            | 0              | 3.65E-07 | * |
| <b>MAPKAPK3</b> | MAP kinase-activated protein kinase 3                                    | 10.5   | 42       | 0            | 0              | 5.53E-07 |   |
| <b>TAB1</b>     | TGF-beta-activated kinase 1 and MAP3K7-binding protein 1                 | 38.25  | 153      | 6.75         | 27             | 7.74E-07 |   |
| <b>MAP3K1</b>   | Mitogen-activated protein kinase kinase kinase 1                         | 9      | 36       | 0            | 0              | 1.01E-06 | * |
| <b>BLK</b>      | Tyrosine-protein kinase Blk                                              | 9.5    | 38       | 0            | 0              | 1.12E-06 | * |
| YWHAQ           | 14-3-3 protein theta                                                     | 9      | 36       | 1.25         | 5              | 1.38E-06 |   |
| PLEKHF2         | Pleckstrin homology domain-containing family F member 2                  | 8.25   | 33       | 0            | 0              | 1.41E-06 |   |
| YWHAZ           | 14-3-3 protein zeta/delta                                                | 10.5   | 42       | 2.5          | 10             | 1.61E-06 |   |
| YWHAH           | 14-3-3 protein eta                                                       | 6      | 24       | 0.25         | 1              | 1.98E-06 |   |
| <b>IRAK4</b>    | Interleukin-1 receptor-associated kinase 4                               | 8.5    | 34       | 2.5          | 10             | 1.99E-06 | * |
| <b>HCK</b>      | Tyrosine-protein kinase HCK                                              | 6      | 24       | 0            | 0              | 4.48E-06 | * |
| <b>MAP4K4</b>   | Mitogen-activated protein kinase kinase kinase kinase 4                  | 54.5   | 218      | 10.75        | 43             | 4.64E-06 | * |
| UNC119B         | Protein unc-119 homolog B                                                | 6      | 24       | 0            | 0              | 5.89E-06 |   |
| <b>STK10</b>    | Serine/threonine-protein kinase 10                                       | 5.5    | 22       | 0            | 0              | 1.23E-05 | * |
| HSPA5           | 78 kDa glucose-regulated protein                                         | 7      | 28       | 2.75         | 11             | 1.38E-05 |   |
| <b>MAPK12</b>   | Mitogen-activated protein kinase 12                                      | 10.75  | 43       | 3.75         | 15             | 1.4E-05  |   |
| <b>TESK2</b>    | Dual specificity testis-specific protein kinase 2                        | 5      | 20       | 0            | 0              | 1.57E-05 | * |
| <b>MLKL</b>     | Mixed lineage kinase domain-like protein                                 | 5      | 20       | 0            | 0              | 1.82E-05 |   |
| <b>CDK19</b>    | Cyclin-dependent kinase 19                                               | 7.5    | 30       | 0            | 0              | 2.77E-05 |   |
| <b>GAK</b>      | Cyclin-G-associated kinase                                               | 22.75  | 91       | 10.25        | 41             | 3.19E-05 | * |
| YWHAG           | 14-3-3 protein gamma                                                     | 11.25  | 45       | 3.25         | 13             | 4.76E-05 |   |
| <b>MINK1</b>    | Misshapen-like kinase 1                                                  | 4      | 16       | 0            | 0              | 6.42E-05 | * |
| CCT4            | T-complex protein 1 subunit delta                                        | 3.5    | 14       | 0            | 0              | 2.55E-04 |   |
| <b>CDK8</b>     | Cyclin-dependent kinase 8                                                | 3.75   | 15       | 0            | 0              | 3.19E-04 |   |
| HSPA4           | Heat shock 70 kDa protein 4                                              | 5.5    | 22       | 1.75         | 7              | 4.09E-04 |   |
| <b>MELK</b>     | Maternal embryonic leucine zipper kinase                                 | 5      | 20       | 1            | 4              | 4.66E-04 |   |
| HSPA9           | Stress-70 protein, mitochondrial                                         | 3.25   | 13       | 0            | 0              | 9.74E-04 |   |
| TCP1            | T-complex protein 1 subunit alpha                                        | 5      | 20       | 1.5          | 6              | 1.23E-03 |   |
| <b>MAPK11</b>   | Mitogen-activated protein kinase 11                                      | 3      | 12       | 0            | 0              | 1.40E-03 | * |
| <b>TAB2</b>     | TGF-beta-activated kinase 1 and MAP3K7-binding protein 2                 | 2.5    | 10       | 0            | 0              | 2.99E-03 |   |
| CCT2            | T-complex protein 1 subunit beta                                         | 3.5    | 14       | 0            | 0              | 5.50E-03 |   |
| TUBA1B          | Tubulin alpha-1B chain                                                   | 18.5   | 74       | 10.25        | 41             | 5.73E-03 |   |
| <b>MAP4K2</b>   | Mitogen-activated protein kinase kinase kinase kinase 2                  | 2.5    | 10       | 0            | 0              | 7.21E-03 |   |
| <b>JAK2</b>     | Tyrosine-protein kinase JAK2                                             | 2.25   | 9        | 0            | 0              | 1.35E-02 |   |
| <b>CDK5</b>     | Cyclin-dependent kinase 5                                                | 7.25   | 29       | 2.75         | 11             | 1.52E-02 |   |
| PAG1            | Phosphoprotein associated with glycosphingolipid-enriched microdomains 1 | 2      | 8        | 0            | 0              | 1.54E-02 |   |
| TPM4            | Tropomyosin alpha-4 chain                                                | 3.5    | 14       | 0.25         | 1              | 1.80E-02 |   |
| HSPA8           | Heat shock cognate 71 kDa protein                                        | 29.25  | 117      | 17.25        | 69             | 2.04E-02 |   |
| <b>RIPK1</b>    | Receptor-interacting serine/threonine-protein kinase 1                   | 1.5    | 6        | 0            | 0              | 2.25E-02 |   |
| NAP1L1          | Nucleosome assembly protein 1-like 1                                     | 2      | 8        | 1.25         | 5              | 2.29E-02 |   |
| <b>RAF1</b>     | RAF proto-oncogene serine/threonine-protein kinase                       | 1.25   | 5        | 0            | 0              | 4.76E-02 |   |
